# Supplementary material
Source: PubMed Central journal article supplement (PMC2671996)
Supplement: NIHMS103237-supplement-Suppl__Data.pdf [file NIHMS103237-supplement-Suppl__Data.pdf]

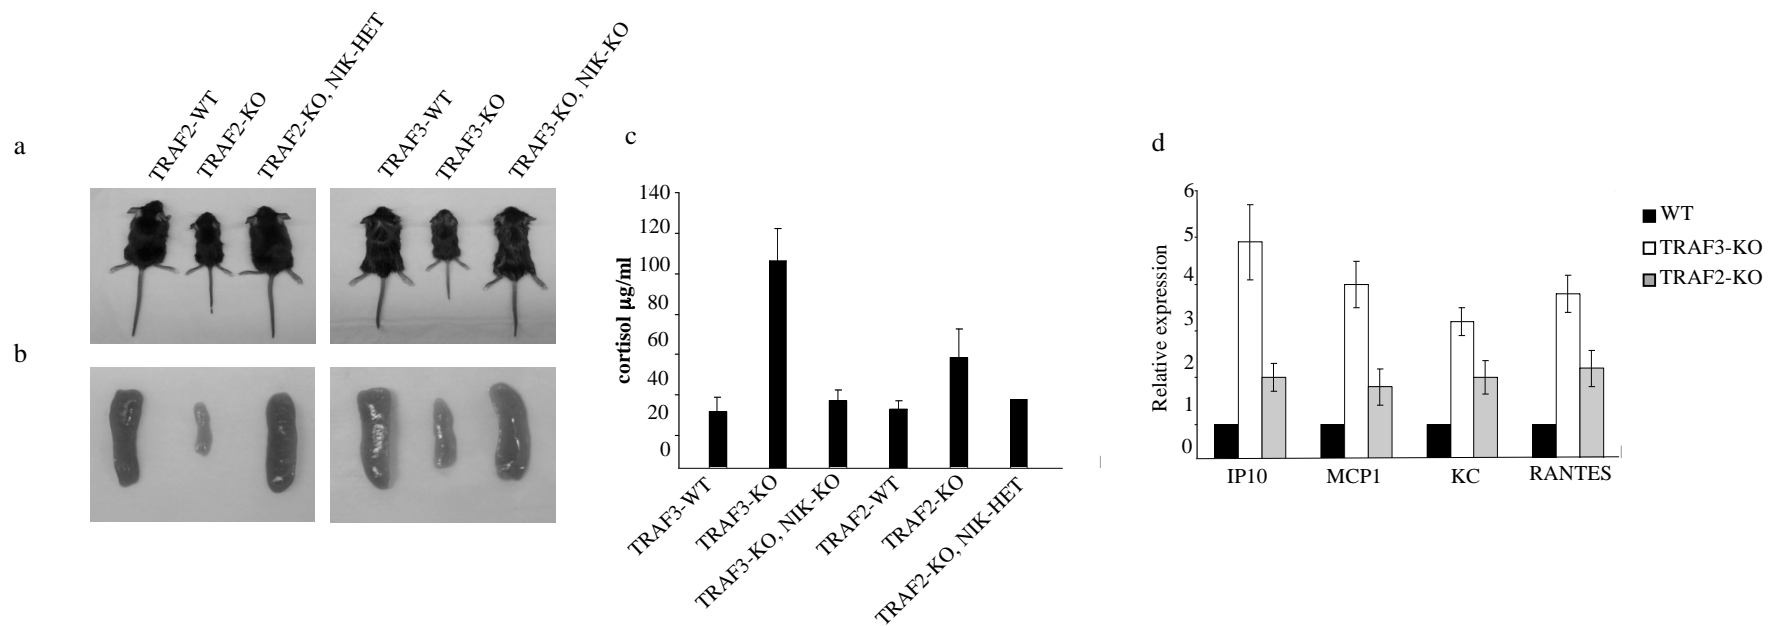

**Supplementary Fig.1. Postnatal lethality, Splenic atrophy and serum cortisol levels in *Traf2*<sup>-/-</sup> and *Traf3*<sup>-/-</sup> mice are due to uncontrolled NIK signaling.** (a) Mice of the indicated genotypes were photographed on postnatal day 15 (P15). Deletion of NIK in *Traf2*<sup>-/-</sup> or *Traf3*<sup>-/-</sup> mice prevents their runted stature ( $n = 4$ ). (b) Spleens from mice of the indicated genotypes were removed on P15 and photographed. Deletion of NIK in *Traf2*<sup>-/-</sup> or *Traf3*<sup>-/-</sup> mice prevents splenic atrophy ( $n = 4$ ). (c) Serum cortisol levels in the indicated mouse strains were measured by ELISA at P15 in at least 2 animals. (d) Total RNA was extracted from WT, *Traf2*<sup>-/-</sup> and *Traf3*<sup>-/-</sup> MEFs and the indicated cytokine mRNA levels were analyzed by quantitative RT-PCR. Results are averages  $\pm$  s.d ( $n = 3$ ). WT, wild-type; TRAF2-KO, *Traf2*<sup>-/-</sup>; TRAF3-KO, *Traf3*<sup>-/-</sup>; NIK-KO, *Map3k14*<sup>-/-</sup>; NIK-HET, *Map3k14*<sup>+/-</sup>.

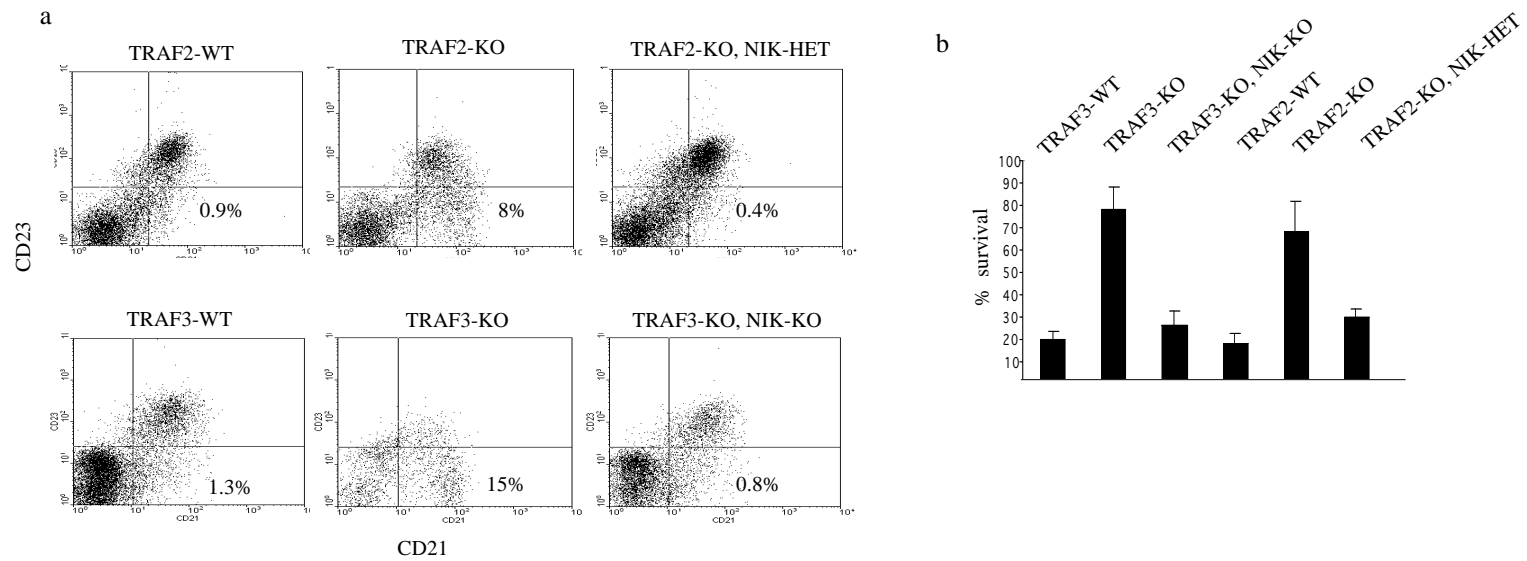

**Supplementary Fig. 2. B-cell abnormalities in *Traf2*<sup>-/-</sup> and *Traf3*<sup>-/-</sup> mice are due to uncontrolled NIK signaling (a).** Splenocytes from the indicated mice were analyzed by flow cytometry after staining with CD23 and CD21 specific antibodies. Numbers indicate the percentages of MZB cells. **(b)** Splenic B-cells from the indicated mice were purified and their survival was analyzed after 24 hrs in culture by trypan blue exclusion. Results are average  $\pm$  s.d ( $n = 3$ ). WT, wild-type; TRAF2-KO, *Traf2*<sup>-/-</sup>; TRAF3-KO, *Traf3*<sup>-/-</sup>; NIK-KO, *Map3k14*<sup>-/-</sup>; NIK-HET, *Map3k14*<sup>+/-</sup>.

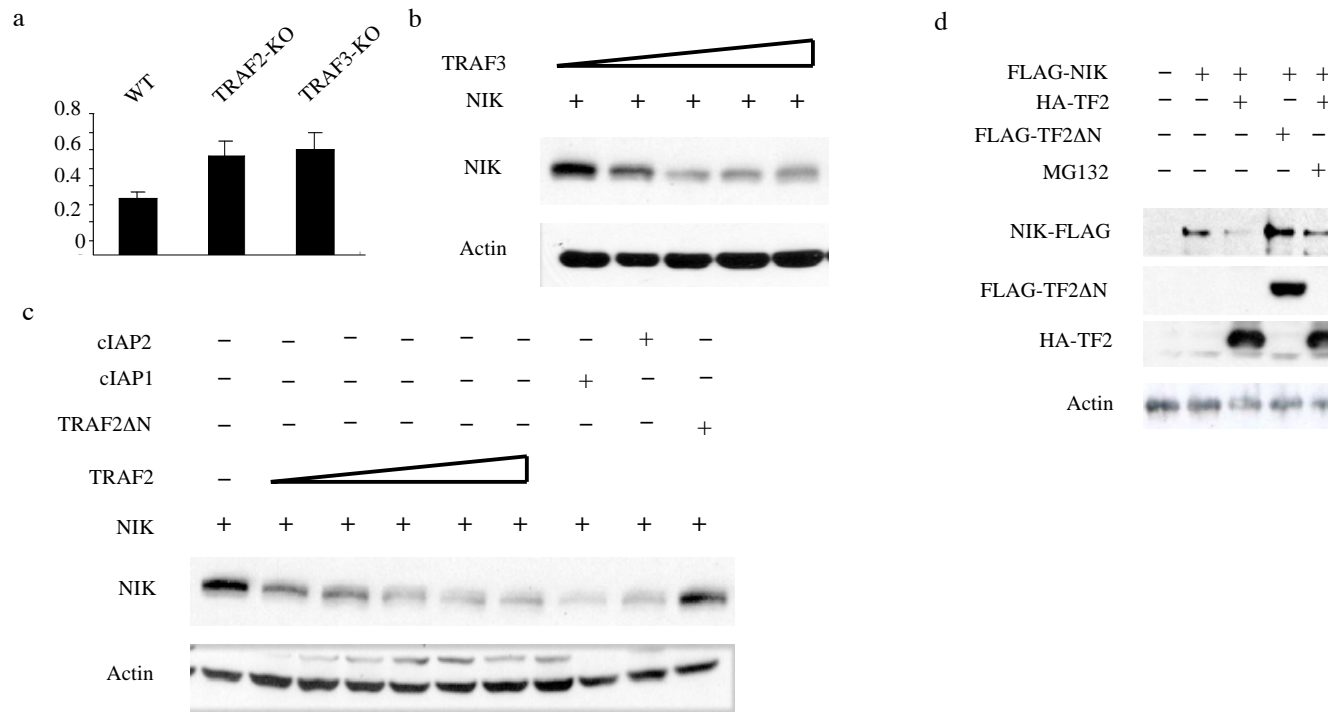

**Supplementary Fig. 3. TRAF2, TRAF3, cIAP1 and cIAP2 induce NIK degradation.** (a) Total RNA from WT, *Traf2*<sup>-/-</sup> and *Traf3*<sup>-/-</sup> MEFs was extracted and NIK mRNA levels were analyzed by quantitative RT-PCR. (b-d) HEK293T cells were co-transfected with the indicated expression vectors (TF2 = TRAF2). Where indicated, cells were treated with 20 mM MG-132 for 6 hrs to inhibit proteasome activity starting 18 hrs after transfection. NIK amounts were examined by immunoblotting using anti-Flag. WT, wild-type; TRAF2-KO, *Traf2*<sup>-/-</sup>; TRAF3-KO, *Traf3*<sup>-/-</sup>.

**a**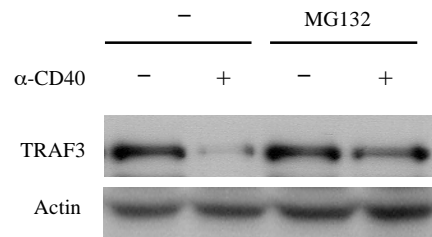**b**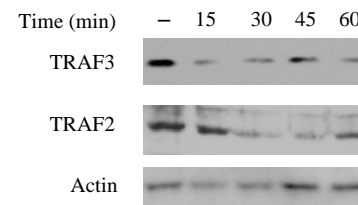**c**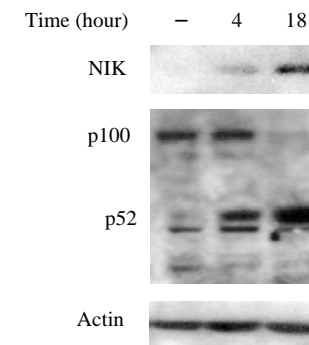

**Supplementary Fig. 4. CD40 signaling induces TRAF3 degradation and NIK accumulation.** (a) A20 cells were stimulated for 30 min with anti-CD40 in the presence or absence of MG-132 and TRAF3 levels were analyzed by immunoblotting. (b) Splenic B-cells were purified and cultured in the presence of anti-CD40 for the indicated times and the amounts TRAF3 and TRAF2 were analyzed by immunoblotting. (c) Splenic B-cells were cultured in the presence or absence of anti-CD40 for the indicated time points and NIK and NF- $\kappa$ B2-p100 and p52 levels were analyzed by immunoblotting.

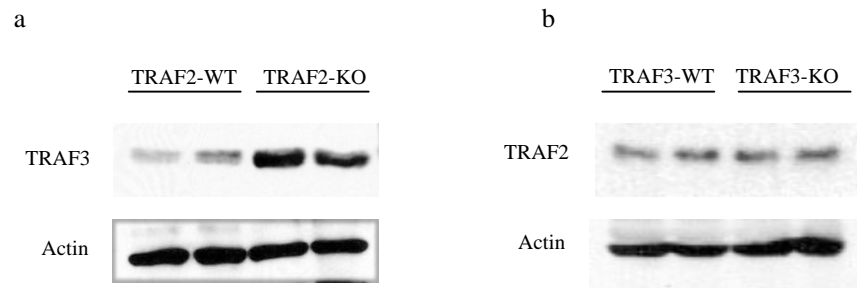

**Supplementary Fig. 5. Elevated TRAF3 expression in TRAF2-deficient MEFs (a,b).** Total cell lysates of WT, *Traf2*<sup>-/-</sup> and *Traf3*<sup>-/-</sup> MEFs were prepared and TRAF2 and TRAF3 amounts were analyzed by immunoblotting. The two lanes for each cell type represent duplicate experiments. WT, wild-type; TRAF2-KO, *Traf2*<sup>-/-</sup>; TRAF3-KO, *Traf3*<sup>-/-</sup>.

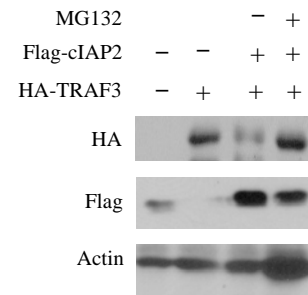

**Supplementary Fig.6. cIAP2 induces proteasome dependent TRAF3**

**degradation.** CD40-expressing HEK293T cells were transfected with expression vectors for Flag-cIAP2 and HA-TRAF3 as indicated and cultured in the presence or absence of MG-132 and the amounts of TRAF3 as well as cIAP2 were analyzed by immunoblotting.

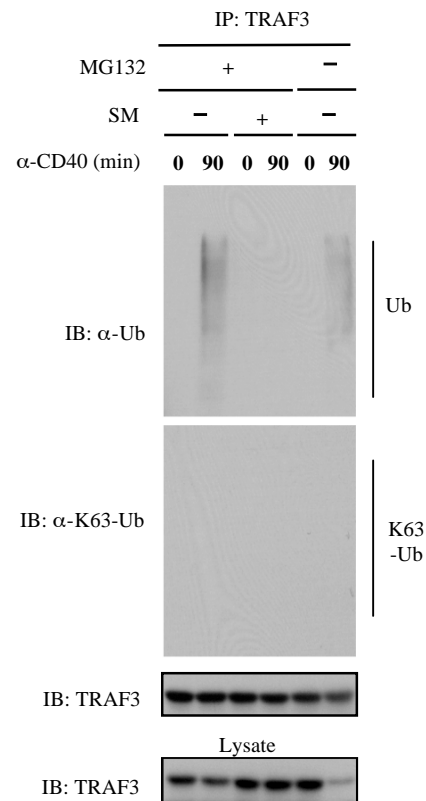

**Supplementary Fig. 7. Endogenous TRAF3 undergoes K48-linked**

**polyubiquitination upon CD40-stimulation.** Splenic B-cells were purified and stimulated for the indicated time with anti-CD40 in the presence or absence of Smac mimic (SM) and MG-132. TRAF3 was immunoprecipitated and its ubiquitination was analyzed by immunoblotting using anti-ubiquitin and K63-specific anti-ubiquitin. Recovery of TRAF3 as well as its levels in the lysates was examined by immunoblotting with anti-TRAF3.

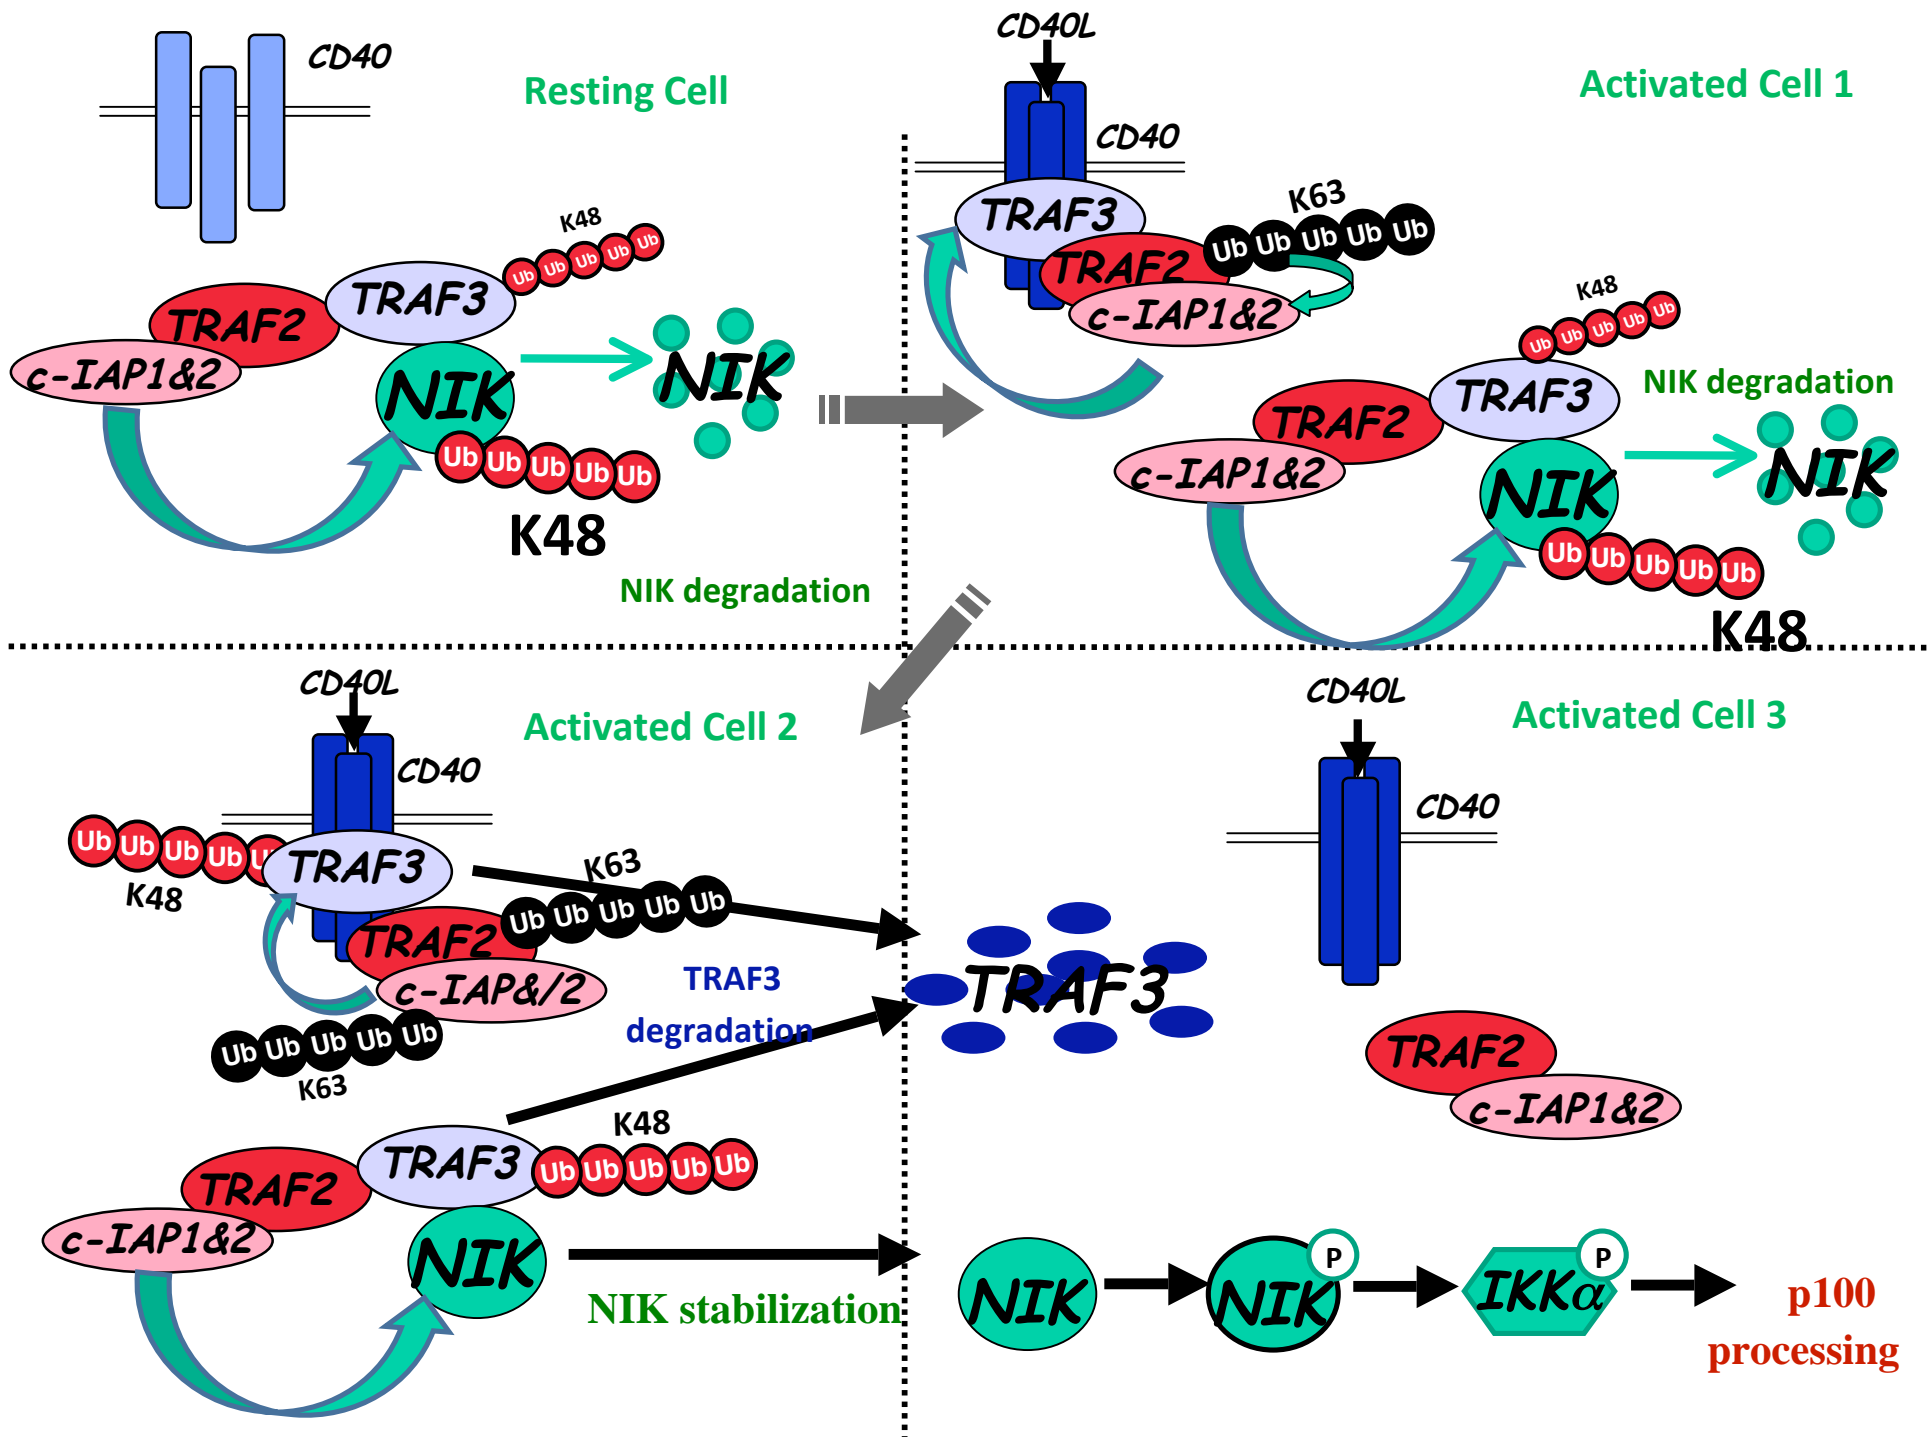



**Supplementary Fig. 8. Control of NIK turnover and alternative NF- $\kappa$ B signaling by TRAF2, TRAF3, cIAP1 and cIAP2.**

In resting cells TRAF3 links NIK to an E3 complex containing TRAF2 and cIAP1 and cIAP2, thereby promoting cIAP1- and/or cIAP2-mediated K48-linked NIK polyubiquitination, and proteasomal degradation. There is also a low level of K48-linked polyubiquitination of TRAF3 under these conditions. Upon CD40 (or BAFF-R) engagement, the cIAP1-cIAP2-TRAF2-TRAF3 complex is recruited to the receptor, where TRAF2 undergoes K63-linked self-ubiquitination and ubiquitinates cIAP1 and/or cIAP2 also through a K63-linkage. The K63-linked polyubiquitination of cIAP1 and/or cIAP2 enhances their K48-specific E3 activity towards TRAF3, resulting in TRAF3 proteasomal degradation. When TRAF3 amounts in the cell drop below a critical threshold, NIK can no longer be recruited to the cIAP1-cIAP2-TRAF2 complex. This results in stabilization and accumulation of newly synthesized NIK, whose autophosphorylation leads to IKK $\alpha$  activation, phosphorylation of p100 and processing of the latter.
